# Supplementary material for: In Vitro Anti-proliferative and Anti-invasive Effect of Polysaccharide-rich Extracts from Trametes Versicolor and Grifola Frondosa in Colon Cancer Cells
Source: PubMed Central journal article supplement — Int J Med Sci. 2019 Jan 1;16(2):231–40. doi: 10.7150/ijms.28811 (PMC6367522; doi:10.7150/ijms.28811), 2019-01-01

***In Vitro* Anti-proliferative and Anti-invasive Effect of Polysaccharide-rich Extracts from *Trametes Versicolor* and *Grifola Frondosa* in Colon Cancer Cells**

Daniel Roca-Lema<sup>1†</sup>, Olaia Martinez-Iglesias<sup>1†</sup>, Catalina Fernández de Ana Portela<sup>2</sup>, Arturo Rodríguez-Blanco<sup>2</sup>, Manuel Valladares Ayerbes<sup>3</sup>, Andrea Díaz-Díaz<sup>1</sup>, Alba Casas-Pais<sup>1</sup>, Cecilia Prego<sup>4</sup> and Angélica Figueroa<sup>1\*</sup>

**Supplementary Figure 1. Full-length blots from Figure 4C.** Full-length blot analysis for E-cadherin is shown in LoVo cells treated with TV and GF extracts. GAPDH is shown as a loading control.

**Supplementary Figure 2. Full-length image from Figure 4E.** Full-length image of zymogram assay in LoVo cells treated with TV and GF extracts.

# Full-blot E-Cadherina/GAPDH

control  
T. Versicolor 100  
T. Versicolor 250  
G. Frondosa 100  
G. Frondosa 250

E-Cadherina

GAPDH

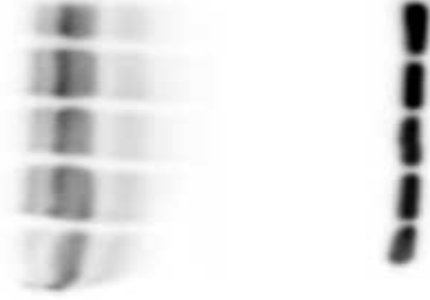

MMP2

control  
T. Versicolor 100  
T. Versicolor 250  
control  
G. Frondosa 100  
G. Frondosa 250

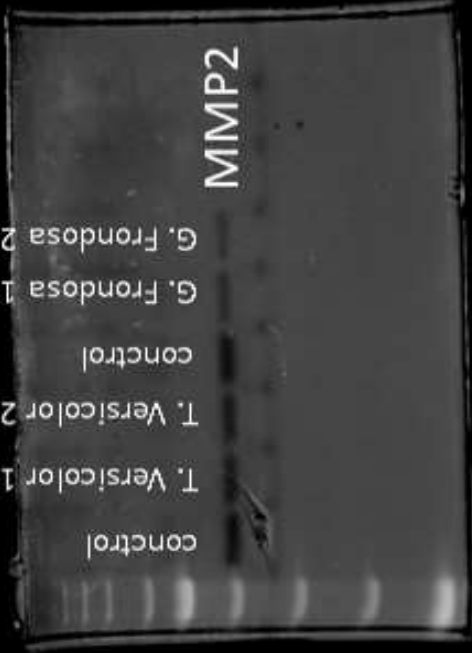

Supplement: ijmsv16p0231s1.pdf [file ijmsv16p0231s1.pdf]
